# Supplementary material for: Genome sequencing of gut symbiotic Bacillus velezensis LC1 for bioethanol production from bamboo shoots
Source: Biotechnol Biofuels. 2020 Feb 28;13:34. doi: 10.1186/s13068-020-1671-9 (PMC7048129; doi:10.1186/s13068-020-1671-9)
Supplement: Supplementary file 2 — Additional file 2: Table S1. COG annotations of carbohydrate metabolism in genome of B. velezensis LC1. [file 13068_2020_1671_MOESM2_ESM.xlsx]

## Sheet: Sheet1
Table S1. COG annotations of carbohydrate metabolism in genome of B. velezensis LC1.
Gene ID	COG ID	COG Description	Identity(%)	Gene Description
gene0019	COG1929	Glycerate kinase	381	glycerate kinase
gene0024	COG3858	hydrolase, family 18	426	spore gernimation protein
gene1419	COG3858	hydrolase, family 18	420	sporulation protein
gene0182	COG0726	4-amino-4-deoxy-alpha-L-arabinopyranosyl undecaprenyl phosphate biosynthetic process	254	polysaccharide deacetylase family sporulation protein PdaB
gene0844	COG0726	4-amino-4-deoxy-alpha-L-arabinopyranosyl undecaprenyl phosphate biosynthetic process	263	delta-lactam-biosynthetic de-N-acetylase
gene1041	COG0726	4-amino-4-deoxy-alpha-L-arabinopyranosyl undecaprenyl phosphate biosynthetic process	282	polysaccharide deacetylase
gene1573	COG0726	4-amino-4-deoxy-alpha-L-arabinopyranosyl undecaprenyl phosphate biosynthetic process	266	polysaccharide deacetylase
gene1783	COG0726	4-amino-4-deoxy-alpha-L-arabinopyranosyl undecaprenyl phosphate biosynthetic process	319	hypothetical protein
gene2577	COG0726	4-amino-4-deoxy-alpha-L-arabinopyranosyl undecaprenyl phosphate biosynthetic process	244	polysaccharide deacetylase
gene3909	COG0726	4-amino-4-deoxy-alpha-L-arabinopyranosyl undecaprenyl phosphate biosynthetic process	280	polysaccharide deacetylase
gene0195	COG0738	Transporter	404	MFS transporter
gene0197	COG0483	inositol monophosphatase	316	inorganic polyphosphate kinase
gene1580	COG0483	inositol monophosphatase	265	inositol monophosphatase
gene0207	COG1472	hydrolase family 3	637	hypothetical protein
gene0209	COG1263	PTS System	455	PTS sugar transporter subunit IIC
gene0819	COG1263	PTS System	471	trehalose permease IIC protein
gene0867	COG1263	PTS System	528	PTS alpha-glucoside transporter subunit IIBC
gene1490	COG1263	PTS System	698	PTS glucose transporter subunit IIABC
gene3823	COG1263	PTS System	460	PTS sucrose transporter subunit IIBC
gene0811	COG1264	pts system	460	PTS sugar transporter
gene0222	COG1109	Catalyzes the conversion of glucosamine-6-phosphate to glucosamine-1-phosphate (By similarity)	448	phosphoglucosamine mutase
gene1005	COG1109	Catalyzes the conversion of glucosamine-6-phosphate to glucosamine-1-phosphate (By similarity)	580	phosphoglucomutase
gene0255	COG2271	transporter	444	glycerol-3-phosphate transporter
gene0317	COG0366	alpha amylase, catalytic	559	alpha-glucosidase
gene0336	COG0366	alpha amylase, catalytic	482	alpha-amylase
gene0337	COG0366	alpha amylase, catalytic	53	alpha-amylase
gene0820	COG0366	alpha amylase, catalytic	561	alpha,alpha-phosphotrehalase
gene3059	COG0366	alpha amylase, catalytic	552	alpha-glucosidase
gene3448	COG0366	alpha amylase, catalytic	561	alpha-glucosidase
gene3454	COG0366	alpha amylase, catalytic	588	alpha-glycosidase
gene0348	ENOG410XSQ2	Xylose isomerase domain protein TIM barrel	262	xylose isomerase
gene0349	ENOG410XPWC	solute carrier family 17	436	MFS transporter
gene0369	COG2723	beta-glucosidase	72	hypothetical protein
gene1280	COG2723	beta-glucosidase	466	6-phospho-beta-galactosidase
gene2085	COG2723	beta-glucosidase	480	aryl-phospho-beta-D-glucosidase
gene3887	COG2723	beta-glucosidase	466	6-phospho-beta-glucosidase
gene0373	COG0269	synthase	211	3-hexulose-6-phosphate synthase
gene0431	COG4975	uptake protein	287	glucose transporter GlcU
gene0437	COG2213	PTS system mannitol-specific	477	PTS mannitol transporter subunit IIB
gene0438	COG4668	pts system	143	PTS mannitol transporter subunit IIA
gene0439	COG0246	Mannitol dehydrogenase	373	mannitol-1-phosphate 5-dehydrogenase
gene1307	COG0246	Mannitol dehydrogenase	481	altronate oxidoreductase
gene0497	COG0662	Mannose-1-phosphate guanylyltransferase Mannose-6-phosphate isomerase	111	hypothetical protein
gene0574	COG0662	Mannose-1-phosphate guanylyltransferase Mannose-6-phosphate isomerase	119	cupin
gene0580	COG0662	Mannose-1-phosphate guanylyltransferase Mannose-6-phosphate isomerase	66	hypothetical protein
gene0500	COG1638	Trap dicarboxylate transporter, dctp subunit	350	C4-dicarboxylate ABC transporter
gene0550	ENOG410XP7I	Transporter	467	MFS transporter
gene0599	ENOG410XNZG	major facilitator superfamily	396	MFS transporter
gene0637	COG2814	Major Facilitator	386	MFS transporter
gene0895	COG2814	Major Facilitator	399	Major Facilitator Superfamily protein
gene1999	COG2814	Major Facilitator	391	MFS transporter
gene2818	COG2814	Major Facilitator	399	MFS transporter
gene3787	COG2814	Major Facilitator	412	MFS transporter
gene4004	COG2814	Major Facilitator	388	MFS transporter
gene0640	COG2807	cyanate catabolic process	404	MFS transporter
gene0648	ENOG410XNQK	Transporter	472	MFS transporter
gene3384	ENOG410XNQK	Transporter	464	MFS transporter
gene3992	ENOG410XNQK	Transporter	462	MFS transporter
gene0676	COG2211	symporter activity	458	putative glucitol transport protein GutA
gene1305	COG2211	symporter activity	461	MFS transporter
gene1869	COG2211	symporter activity	453	MFS transporter
gene0677	COG0524	pfkb domain protein	320	sugar kinase
gene1936	COG0524	pfkb domain protein	318	2-keto-3-deoxygluconate kinase
gene3197	COG0524	pfkb domain protein	284	fructosamine kinase
gene3592	COG0524	pfkb domain protein	293	ribokinase
gene3987	COG0524	pfkb domain protein	330	5-dehydro-2-deoxygluconokinase
gene0776	ENOG410XPTC	Major Facilitator superfamily	409	MFS transporter
gene0784	ENOG410XQDT	Major Facilitator superfamily	394	MFS transporter
gene0791	COG3866	pectate lyase activity	421	pectate lyase
gene3935	COG3866	pectate lyase activity	354	pectate lyase
gene0831	ENOG410XRAD	Major Facilitator	397	MFS transporter
gene0838	ENOG410XR1I	Major Facilitator	384	MFS transporter
gene0865	COG1486	glycoside hydrolase family 4	449	6-phospho-alpha-glucosidase
gene2945	COG1486	glycoside hydrolase family 4	432	alpha-glucosidase/alpha-galactosidase
gene3871	COG1486	glycoside hydrolase family 4	442	6-phospho-beta-glucosidase
gene0881	COG3936	Intercellular adhesion protein C	362	acyltransferase
gene0882	COG0574	phosphotransferase activity, paired acceptors	803	phosphoenolpyruvate synthase
gene1874	COG0574	phosphotransferase activity, paired acceptors	865	phosphoenolpyruvate synthase
gene3507	COG0574	phosphotransferase activity, paired acceptors	833	phosphotransferase
gene0885	COG0477	major facilitator Superfamily	530	MFS transporter
gene1135	COG0477	major facilitator Superfamily	398	MFS transporter
gene2581	COG0477	major facilitator Superfamily	418	MFS transporter
gene3984	COG0477	major facilitator Superfamily	431	MFS transporter
gene1002	COG0580	Channel that permits osmotically driven movement of water in both directions. It is involved in the osmoregulation and in the maintenance of cell turgor during volume expansion in rapidly growing cells. It mediates rapid entry or exit of water in response to abrupt changes in osmolarity (By similarity)	276	GlpF
gene1112	COG0406	Phosphoglycerate mutase	191	phosphatase
gene1228	COG0061	Catalyzes the phosphorylation of NAD to NADP. Utilizes ATP and other nucleoside triphosphates as well as inorganic polyphosphate as a source of phosphorus (By similarity)	266	NAD kinase
gene2863	COG0061	Catalyzes the phosphorylation of NAD to NADP. Utilizes ATP and other nucleoside triphosphates as well as inorganic polyphosphate as a source of phosphorus (By similarity)	276	inorganic polyphosphate/ATP-NAD kinase
gene1274	COG3867	arabinogalactan endo-1,4-beta-galactosidase	370	GanA
gene1275	COG4468	UDP-glucose-hexose-1-phosphate uridylyltransferase	499	galactose-1-phosphate uridylyltransferase
gene3837	COG4468	UDP-glucose-hexose-1-phosphate uridylyltransferase	513	galactose-1-phosphate uridylyltransferase
gene1277	COG0153	Catalyzes the transfer of the gamma-phosphate of ATP to D-galactose to form alpha-D-galactose-1-phosphate (Gal-1-P) (By similarity)	389	galactokinase
gene3838	COG0153	Catalyzes the transfer of the gamma-phosphate of ATP to D-galactose to form alpha-D-galactose-1-phosphate (Gal-1-P) (By similarity)	394	galactokinase
gene1278	COG1455	pts system	565	PTS lactose transporter subunits IICB
gene3857	COG1455	pts system	444	oligo-beta-mannoside permease IIC protein
gene3873	COG1455	pts system	452	oligo-beta-mannoside permease IIC protein
gene3886	COG1455	pts system	439	oligo-beta-mannoside permease IIC protein
gene1279	COG1447	IIa component	104	PTS lactose transporter subunit IIA
gene3872	COG1447	IIa component	110	PTS cellobiose transporter subunit IIA
gene3885	COG1447	IIa component	105	PTS dihydroxyacetone transporter
gene1304	COG1904	Uronic isomerase	465	glucuronate isomerase
gene1308	COG2721	Dehydratase	497	altronate hydrolase
gene1392	COG2706	6-phosphogluconolactonase	349	hypothetical protein
gene1444	COG3594	Acyltransferase	340	acyltransferase
gene1452	COG1850	RuBisCO catalyzes two reactions the carboxylation of D- ribulose 1,5-bisphosphate, the primary event in carbon dioxide fixation, as well as the oxidative fragmentation of the pentose substrate	404	2,3-diketo-5-methylthiopentyl-1-phosphate enolase
gene1454	COG0235	Class II aldolase adducin	209	methylthioribulose-1-phosphate dehydratase
gene2792	COG0235	Class II aldolase adducin	229	L-ribulose-5-phosphate 4-epimerase
gene2190	COG2190	pts system	168	PTS glucose transporter subunit IIA
gene1491	COG1925	phosphocarrier protein (HPr)	88	phosphocarrier protein HPr
gene3464	COG1925	phosphocarrier protein (HPr)	85	phosphate ABC transporter permease
gene1492	COG1080	General (non sugar-specific) component of the phosphoenolpyruvate-dependent sugar phosphotransferase system (sugar PTS). This major carbohydrate active-transport system catalyzes the phosphorylation of incoming sugar substrates concomitantly with their translocation across the cell membrane. Enzyme I transfers the phosphoryl group from phosphoenolpyruvate (PEP) to the phosphoryl carrier protein (…	571	phosphoenolpyruvate--protein phosphotransferase
gene1537	COG1105	1-phosphofructokinase	303	1-phosphofructokinase
gene1538	COG1299	pts system	634	PTS fructose transporter subunit IIA
gene2614	COG1299	pts system	652	PTS mannose transporter subunit IIABC
gene1691	COG0036	ribulose-phosphate 3-epimerase activity	216	ribulose-phosphate 3-epimerase
gene1867	COG3386	SMP-30 gluconolaconase LRE domain protein	361	gluconolaconase
gene3277	COG3386	SMP-30 gluconolaconase LRE domain protein	292	Regucalcin RC
gene1870	COG3507	hydrolase family 43	471	xylan 1,4-beta-xylosidase
gene2795	COG3507	hydrolase family 43	321	arabinan endo-1,5-alpha-L-arabinosidase
gene3949	COG3507	hydrolase family 43	461	hypothetical protein
gene1871	COG1940	ROK family	384	XylR family transcriptional regulator
gene2487	COG1940	ROK family	320	glucose kinase
gene3888	COG1940	ROK family	193	fructokinase
gene3889	COG1940	ROK family	62	fructokinase
gene1872	COG2115	Xylose isomerase	445	xylose isomerase
gene1873	COG1070	Carbohydrate kinase	499	xylulokinase
gene2016	COG1070	Carbohydrate kinase	488	sugar kinase
gene3398	COG1070	Carbohydrate kinase	514	gluconate kinase
gene1908	COG0021	Transketolase	667	transketolase
gene1938	COG0800	Aldolase	211	ketohydroxyglutarate aldolase
gene1939	COG1312	Catalyzes the dehydration of D-mannonate (By similarity)	358	mannonate dehydratase
gene1942	ENOG410XR3C	Major Facilitator	422	MFS transporter
gene1947	ENOG410ZUX6	Major Facilitator	74	hypothetical protein
gene1950	COG2730	Glycoside hydrolase Family 5	499	endoglucanase
gene1954	COG5520	glucosylceramidase activity	423	glucuronoxylanase
gene2084	COG5520	glucosylceramidase activity	489	glycosyl hydrolase
gene1955	ENOG410XPHB	hydrolase family 43	467	arabinoxylan arabinofuranohydrolase
gene1992	COG2017	converts alpha-aldose to the beta-anomer. It is active on D-glucose, L-arabinose, D-xylose, D-galactose, maltose and lactose (By similarity)	322	aldose epimerase
gene2015	ENOG410XTI9	Major Facilitator Superfamily	415	MFS transporter
gene2215	COG1803	Methylglyoxal synthase	137	methylglyoxal synthase
gene2219	COG2140	Oxalate decarboxylase	295	oxalate decarboxylase
gene2220	COG2140	Oxalate decarboxylase	89	oxalate decarboxylase
gene3284	COG2140	Oxalate decarboxylase	386	oxalate decarboxylase
gene2324	COG1015	Phosphotransfer between the C1 and C5 carbon atoms of pentose (By similarity)	395	phosphopentomutase
gene2381	COG0364	Glucose-6-phosphate 1-dehydrogenase	489	glucose-6-phosphate dehydrogenase
gene2382	COG0362	Catalyzes the oxidative decarboxylation of 6- phosphogluconate to ribulose 5-phosphate and CO(2), with concomitant reduction of NADP to NADPH (By similarity)	469	phosphogluconate dehydrogenase (NADP(+)-dependent, decarboxylating)
gene2406	COG2513	methylisocitrate lyase	301	methylisocitrate lyase
gene2503	ENOG410XQRZ	Major Facilitator	429	MFS transporter
gene2605	ENOG4111NU0	transporter major facilitator family protein	457	tetracycline resistance MFS efflux pump
gene2613	COG1482	mannose-6-phosphate isomerase	315	mannose-6-phosphate isomerase
gene3568	COG1482	mannose-6-phosphate isomerase	316	mannose-6-phosphate isomerase
gene3890	COG1482	mannose-6-phosphate isomerase	314	mannose-6-phosphate isomerase
gene2619	ENOG410XP8J	Major Facilitator Superfamily	402	MFS transporter
gene2761	COG3534	Alpha-N-arabinofuranosidase (EC 3.2.1.55)	496	alpha-N-arabinofuranosidase
gene2785	COG3534	Alpha-N-arabinofuranosidase (EC 3.2.1.55)	499	alpha-N-arabinofuranosidase
gene2786	COG0395	Binding-protein-dependent transport systems inner membrane component	237	AraQ
gene2944	COG0395	Binding-protein-dependent transport systems inner membrane component	273	maltose ABC transporter permease
gene2789	COG1653	transporter activity	431	arabinose-binding protein
gene2942	COG1653	transporter activity	425	binding protein msmE
gene2791	COG0647	Hydrolase	265	haloacid dehalogenase
gene3172	COG0647	Hydrolase	256	haloacid dehalogenase
gene2793	COG1069	ribulokinase	561	ribulokinase
gene2794	COG2160	Catalyzes the conversion of L-arabinose to L-ribulose (By similarity)	497	L-arabinose isomerase
gene2816	COG0057	glyceraldehyde3phosphate dehydrogenase	340	glyceraldehyde-3-phosphate dehydrogenase
gene3382	COG0057	glyceraldehyde3phosphate dehydrogenase	335	type I glyceraldehyde-3-phosphate dehydrogenase
gene2837	COG0469	Pyruvate kinase	585	pyruvate kinase
gene2838	COG0205	phosphohexokinase	319	ATP-dependent 6-phosphofructokinase
gene2952	ENOG410ZVV9	Major Facilitator	394	MFS transporter
gene3067	COG0166	glucose-6-phosphate isomerase activity	450	glucose-6-phosphate isomerase
gene3083	ENOG410ZFD1	Major Facilitator Superfamily	379	MFS transporter
gene3191	ENOG410XQPT	Major Facilitator superfamily	398	tetracycline resistance MFS efflux pump
gene3195	COG3839	(ABC) transporter	368	glycerol-3-phosphate ABC transporter ATP-binding protein
gene3910	COG3839	(ABC) transporter	366	MsmX
gene3198	ENOG410YEY9	Binding-protein-dependent transport system inner membrane component	294	ABC transporter permease
gene3200	ENOG410XPV5	extracellular solute-binding protein, family 1	428	sugar ABC transporter substrate-binding protein
gene3377	COG0148	Catalyzes the reversible conversion of 2- phosphoglycerate into phosphoenolpyruvate. It is essential for the degradation of carbohydrates via glycolysis (By similarity)	430	enolase
gene3378	COG0696	Catalyzes the interconversion of 2-phosphoglycerate and 3-phosphoglycerate (By similarity)	511	2,3-bisphosphoglycerate-independent phosphoglycerate mutase
gene3379	COG0149	triosephosphate isomerase	253	triose-phosphate isomerase
gene3380	COG0126	phosphoglycerate kinase	394	phosphoglycerate kinase
gene3442	COG1621	Hydrolase	489	sucrose-6-phosphate hydrolase
gene3822	COG1621	Hydrolase	479	sucrose-6-phosphate hydrolase
gene4083	COG1621	Hydrolase	505	levanase
gene3443	ENOG410XQTD	oligosaccharide H symporter, major facilitator superfamily (MFS)	410	MFS transporter, OHS family, lactose permease
gene3449	COG1554	hydrolase family 65	757	maltose phosphorylase
gene3453	COG2182	extracellular solute-binding protein, family 1	414	sugar ABC transporter substrate-binding protein
gene3494	COG1820	GlcNAc 6-P deacetylase	396	N-acetylglucosamine-6-phosphate deacetylase
gene3495	COG0363	Catalyzes the reversible isomerization-deamination of glucosamine 6-phosphate (GlcN6P) to form fructose 6-phosphate (Fru6P) and ammonium ion (By similarity)	241	glucosamine-6-phosphate deaminase
gene3566	COG4193	endo-beta-N-acetylglucosaminidase	873	beta-N-acetylglucosaminidase
gene3574	ENOG410XQKC	major facilitator superfamily	457	MFS transporter
gene4107	ENOG410XQKC	major facilitator superfamily	443	MFS transporter
gene3593	COG1869	Catalyzes the interconversion of beta-pyran and beta- furan forms of D-ribose (By similarity)	131	D-ribose pyranase
gene3595	COG1172	(ABC) transporter	323	ribose ABC transporter permease
gene3596	COG1879	Periplasmic binding protein LacI transcriptional regulator	305	D-ribose ABC transporter substrate-binding protein
gene3653	ENOG410XQ1F	Major Facilitator superfamily	454	MFS transporter
gene3702	COG0698	Isomerase	149	ribose-5-phosphate isomerase
gene3720	COG1494	Fructose-1,6-bisphosphatase	321	fructose-1,6-bisphosphatase, class II
gene3722	COG0176	Transaldolase is important for the balance of metabolites in the pentose-phosphate pathway (By similarity)	212	transaldolase
gene3723	COG0191	Aldolase	285	fructose-bisphosphate aldolase
gene3980	COG0191	Aldolase	290	fructose-1,6-bisphosphate aldolase, class II
gene3874	COG1440	protein-N(PI)-phosphohistidine-sugar phosphotransferase activity	102	PTS sugar transporter subunit IIB
gene3884	COG1440	protein-N(PI)-phosphohistidine-sugar phosphotransferase activity	103	PTS sugar transporter subunit IIB
gene3891	COG4124	mannan endO-1,4-beta-mannosidase	360	beta-mannosidase
gene3902	COG0063	Together with NAD(P)HX epimerase, which catalyzes the epimerization of the S- and R-forms, the enzyme allows the repair of both epimers of NAD(P)HX, a damaged form of NAD(P)H that is a result of enzymatic or heat-dependent hydration (By similarity)	276	NAD(P)H-hydrate dehydratase
gene3931	COG2273	hydrolase family 16	243	beta-glucanase
gene3933	COG2270	Major Facilitator superfamily	426	MFS transporter
gene3981	COG1082	Xylose isomerase domain protein TIM barrel	276	isomerase
gene3982	COG1082	Xylose isomerase domain protein TIM barrel	289	protein iolH
gene3985	COG1082	Xylose isomerase domain protein TIM barrel	298	myo-inosose-2 dehydratase
gene3988	COG3718	myo-inositol catabolism	271	5-deoxy-glucuronate isomerase
gene4012	COG3855	D-fructose-1,6-bisphosphate 1-phosphohydrolase class 3	641	"fructose-1,6-bisphosphatase"
gene4042	ENOG4111K1F	Major Facilitator	396	MFS transporter
gene4082	ENOG410XR0E	levansucrase EC 2.4.1.10	473	levansucrase
gene1049	COG0702	epimerase dehydratase	206	hypothetical protein
gene1104	COG0702	epimerase dehydratase	215	hypothetical protein
gene3559	COG1134	(ABC) transporter	514	teichoic acid ABC transporter ATP-binding protein
gene3631	COG4464	Capsular polysaccharide biosynthesis protein	254	tyrosine protein phosphatase
gene0321	COG2141	Monooxygenase	331	hypothetical protein
gene0959	COG2141	Monooxygenase	378	alkanesulfonate monooxygenase
gene1889	COG2141	Monooxygenase	357	luciferase
gene3320	COG2141	Monooxygenase	442	monooxygenase
gene3322	COG2141	Monooxygenase	335	hypothetical protein
gene3386	COG2141	Monooxygenase	335	luciferase
gene3827	COG2141	Monooxygenase	333	hypothetical protein
